# Supplementary material
Source: publisher figshare collection journal article supplement (https://tandf.figshare.com/ndownloader/files/13182616)
Supplement: Supplementary file 1 [file 13182616]

**Supplementary material**

**Table S1.** Morphometric characterizations of *Spirostrombidium paraurceolare* sp. nov. (upper lines) and *Spirostrombidium faurefremieti* sp. nov. (lower lines).

| Charactersa | Min | Max | Mean | SD | CV | *n* |
| --- | --- | --- | --- | --- | --- | --- |
| Body, length | 23  55 | 43  66 | 32.3  60.8 | 5.40  3.02 | 16.7  5.0 | 21  14 |
| Body, width | 16  32 | 25  42 | 20.1  38.1 | 2.80  3.32 | 13.9  8.7 | 19  18 |
| Distance from anterior cell end to cytostome | 10  25 | 16  34 | 13.1  29.6 | 1.57  2.47 | 11.9  8.3 | 20  16 |
| Distance from anterior cell  end to ventral kinety | 18  30 | 31  42 | 22.9  34.8 | 3.93  3.46 | 17.1  10.0 | 20  14 |
| Distance from GK to VK | 5  6 | 10  12 | 7.3  7.2 | 1.50  1.52 | 20.5  19.8 | 9  17 |
| Distance between posterior cell end and anterior end of VK | 6  24 | 14  30 | 9.7  26.2 | 2.02  1.81 | 20.8  6.9 | 20  14 |
| Number of collar membranelles | 15  23 | 18  28 | 16.2  25.6 | 0.83  1.60 | 5..1  6.2 | 14  14 |
| Number of buccal membranelles | 8  15 | 10  19 | 8.6  17.5 | 0.67  1.40 | 7.8  8.0 | 14  14 |
| Number of thigmotactic membranelles | 3  2 | 3  2 | 3  2 | 0  0 | 0  0 | 17  20 |
| Number of dikinetids in GK | 47  105 | 63  126 | 55.8  111.9 | 5.04  5.23 | 9.0  4.7 | 17  18 |
| Number of dikinetids in VK | 12  25 | 17  29 | 14.2  26.1 | 1.63  1.35 | 11.5  5.2 | 14  18 |
| Macronuclear segment, length | 8  25 | 15  42 | 11.1  34.1 | 1.79  4.57 | 16.1  13.4 | 10  14 |
| Macronuclear segment, width | 4  11 | 6  28 | 5.4  17.9 | 0.70  4.30 | 13.0  24.0 | 10  25 |
| Number of macronuclear segments | 1  1 | 4  1 | 2.8  1 | 0.68  0 | 24.3  0 | 15  14 |

a Data based on protargol stained specimens. Measurements in μm. CV, coefficient of variation in %; GK, girdle kinety; Max, maximum; Mean, arithmetic mean; Min, minimum; *n*, number of individuals examined; SD, standard deviation; VK, ventral kinety.

**Table S2.** Morphometric comparison among morphologically similar strombidiids. 1- *Spirostrombidium paraurceolare* sp. nov. (present work); 2- *Spirostrombidium faurefremieti* sp. nov. (present work); 3-*Spirostrombidium urceolare* (from Stein, 1867); 4-*Strombidium sauerbreyae* sensu Fauré-Fremiet, 1950 (from Fauré-Fremiet, 1950); 5-*Strombidium cylindromorphum* Perejaslawzewa, 1886 (from Kahl, 1932), 6 -*Strombidium armatum* Burger, 1908 (from Song et al., 2000); 7-*Strombidium clavellinae* Buddenbrock, 1922 (from Fauré-Fremiet, 1932); 8-*Strombidium sauerbreyae* Kahl, 1932 (from Kahl, 1932); 9-*Strombidium faurei* Dragesco, 1960 (from Dragesco, 1960); 10-*Strombidium macronucleatum* Dragesco, 1960 (from Dragesco, 1960).

| Characters | 1 | 2 | 3 | 4 | 5 | 6 | 7 | 8 | 9 | 10 |
| --- | --- | --- | --- | --- | --- | --- | --- | --- | --- | --- |
| BL in vivo | 40–60 | 55–70 | n/a | ca. 75 | ca. 40 | 50–60 | 70–80 | 80–100 | *ca.* 75 | 80–135 |
| Body shape | oblong | ellipsoidal | pot-like | ellipsoidal | cylindrical | ellipsoidal | widely oval | widely oval | ellipsoidal | widely oval |
| BFL: BL | ca. 1/4 | ca. 2/3 | ca. 1/4 | ca. 1/2 | ca. 1/2 | ca. 1/2 | ca. 1/3 | ca. 1/3 | ca. 1/4 | ca. 1/3 |
| TM, number | 3 | 2 | 3 | 2 | 0 | 3 | 4 | 0 | 2 | 0 |
| Ma, number | 1–4 | 1 | 1 | 1 | N/A | 1 | 1 | 1 | 1 | 1 |
| Habitat | marine | marine | marine | marine | marine | marine | marine | marine | marine | marine |

BFL, buccal field length; BL, body length; Ma, macronuclear nodules; n/a, non available; TM, thigmotactic membranelles
